# Supplementary material for: Adsorption of reactive red dye (RR-120) on nanoadsorbent O-carboxymethylchitosan/γ-Fe2O3: kinetic, equilibrium and factorial design studies
Source: Royal Society of Chemistry journal article supplement (doi:10.1039/c6ra04249j), 2016-01-01
Supplement: c6ra04249j1.pdf [file c6ra04249j1.pdf]

## Electronic Supplementary Information

### Adsorption of reactive red dye (RR-120) on nanoadsorbent of O-carboxymethylchitosan/ $\gamma$ - $\text{Fe}_2\text{O}_3$ : kinetic, equilibrium and factorial design studies

Carla Albertina Demarchi<sup>1</sup>, Tamiris Chahm<sup>1</sup>, Bruna Martins<sup>1</sup>, Natalia Nedelko<sup>2</sup>, Anna Ślawska-Waniewska<sup>2</sup>, Piotr Dłużewski, Elzbieta Dynowska<sup>2</sup>, Jean-Marc Greneche<sup>3</sup>, Clovis Antonio Rodrigues<sup>1\*</sup>

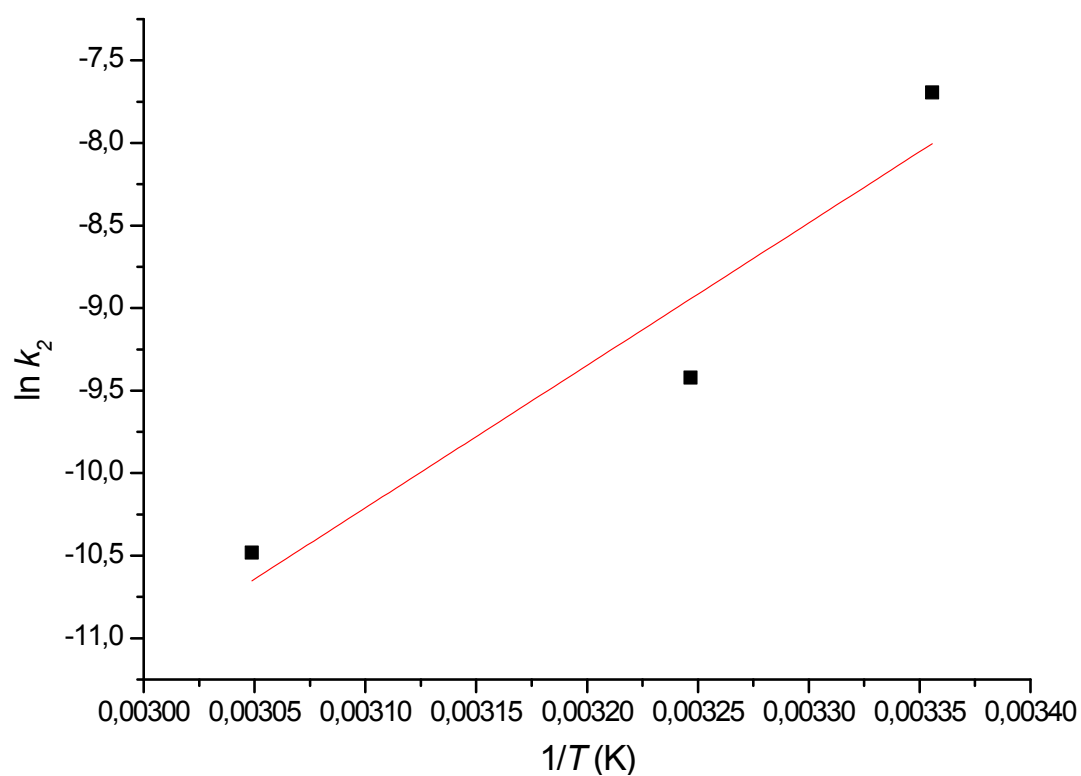

Fig. ESI1: Arrhenius plot for the adsorption of RR120 onto O-CM.

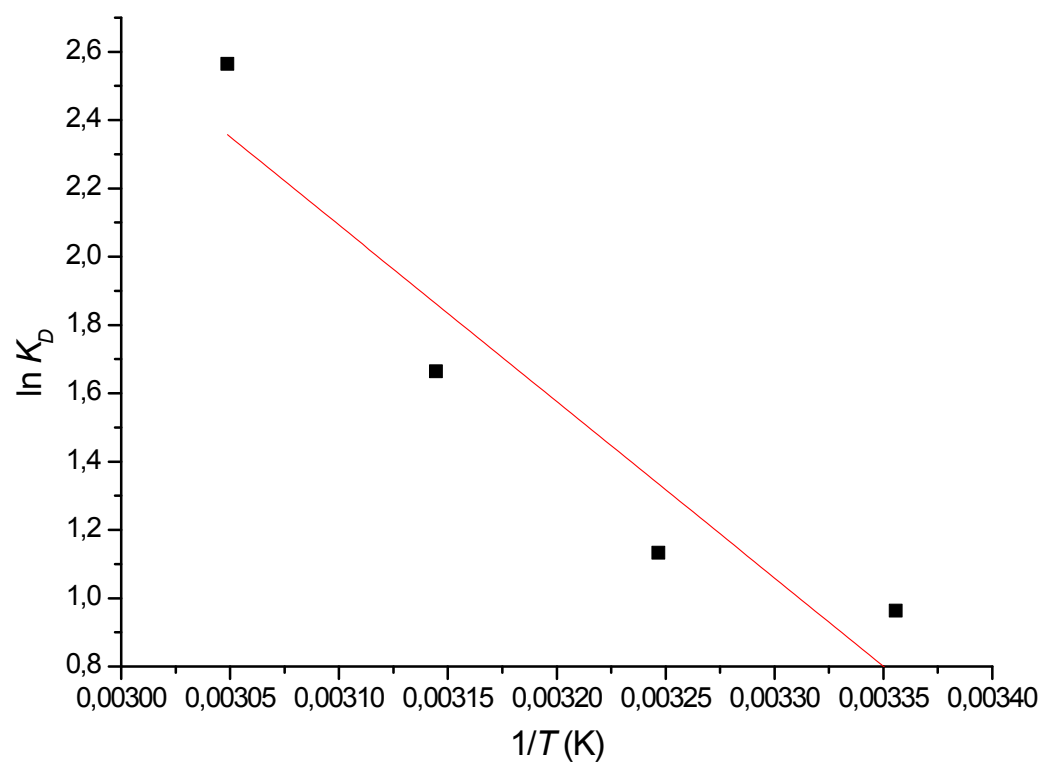

Fig. ESI2: Van't Hoff plot for the adsorption of RR120 onto O-CM.

### Study of different adsorbent effect

The effect of adsorbent was determined using 20 mg of adsorbent (O-C, O-Fe<sub>3</sub>O<sub>4</sub> and O-CM) 20 mL of RR120 solution 250 mg L<sup>-1</sup>, and temperature of 25°C, under continuous agitation and initial pH 2.5 and 7.5. After 60 min of contact time, the concentrations of RR120 left in the supernatant solutions were determined, to study the effect of different adsorbent. The adsorbent was then separated using an external magnetic field or centrifugation, and the amount of RR120 adsorbed was calculated, as described in 2.5.

Table ESI 1: Effect of different adsorbent by adsorption of RR120.

| adsorbent                      | Adsorption capacity (mg g <sup>-1</sup> ) |        |
|--------------------------------|-------------------------------------------|--------|
|                                | pH 2.5                                    | pH 7.5 |
| Fe <sub>3</sub> O <sub>4</sub> | 66                                        | 75     |
| Crosslinked O-C                | 245                                       | 128    |
| O-CM                           | 240                                       | 212    |
